# Supplementary material for: Electrospun silica nanofiber mats functionalized with ceria nanoparticles for water decontamination
Source: Royal Society of Chemistry journal article supplement (doi:10.1039/c9ra03467f), 2019-01-01
Supplement: c9ra03467f1.pdf [file c9ra03467f1.pdf]

1 Electronic Supplementary Information

2

3

4

5

6

7

Ines Zucker<sup>a,b,c\*</sup>, Nadir Dizge<sup>a,d</sup>, Camrynn L. Fausey<sup>a</sup>, Evyatar Shaulsky<sup>a</sup>, Meng Sun<sup>a</sup>,

8

Menachem Elimelech<sup>a</sup>

9

10

11 <sup>a</sup> *Department of Chemical and Environmental Engineering, Yale University, New Haven,*

12

*Connecticut 06520-8286*

13

<sup>b</sup> *Porter School of Environmental Studies, Tel Aviv University, Israel*

14

<sup>c</sup> *School of Mechanical Engineering, Tel Aviv University, Israel*

15

<sup>d</sup> *Department of Environmental Engineering, Mersin University, Mersin, 33343, Turkey*

16

17 **Enclosed:**

18 **Fig. S.1-S.6**

19 **Table S.1**

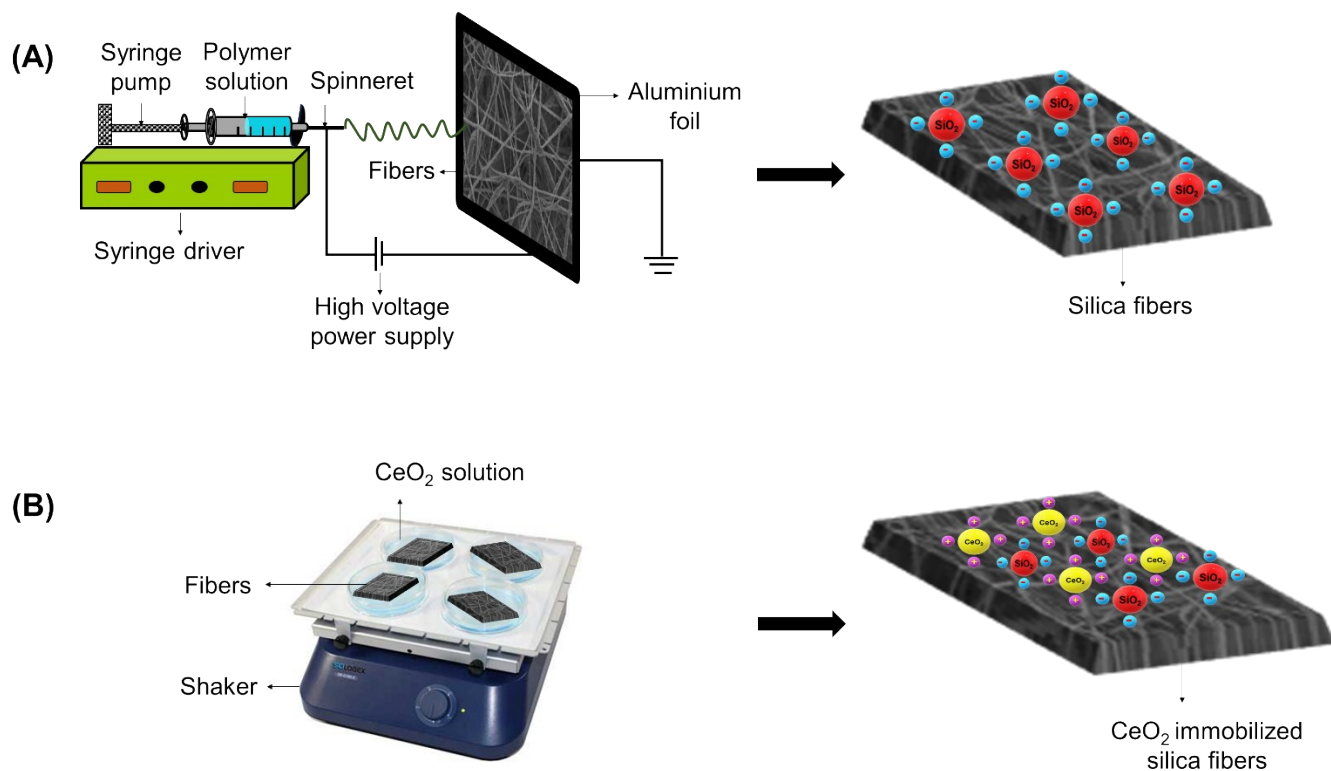

20

21

22 **Fig. S.1.** Schematic illustration of fabricating electrospun CeO<sub>2</sub> composite silica fibers. (A)

23 Preparation of silica fibers by electrospinning. Experimental conditions: collector distance, 11

24 cm; rotating drum speed, 16 cm min<sup>-1</sup>; collection time, 10 h; flow rate, 0.5 mL h<sup>-1</sup>; applied

25 voltage, 13 kV; temperature, 30°C; relative humidity, 30%. (B) CeO<sub>2</sub> immobilization on

26 silica fibers. Experimental conditions: CeO<sub>2</sub> concentration, 1 mg mL<sup>-1</sup>; fiber weight, 10 mg;

27 shaker speed, 75 rpm; volume, 10 mL, immobilization time, 16 h; temperature, 25 °C.

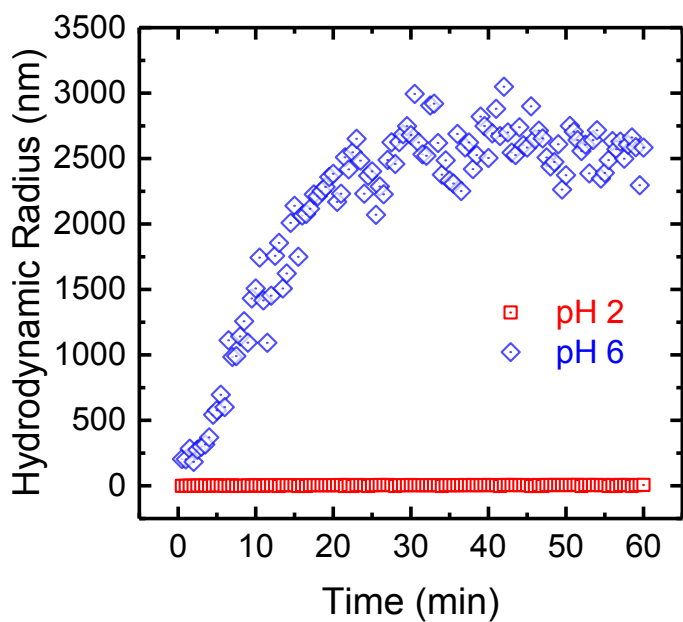

28

29 **Fig. S.2.** Aggregation kinetics for ceria nanoparticle suspension (in 10 mM acetate buffer  
30 solution) at pH 2 and 6 as determined by dynamic light scattering. Light scattering data are  
31 presented as the corresponding spherical hydrodynamic radius.

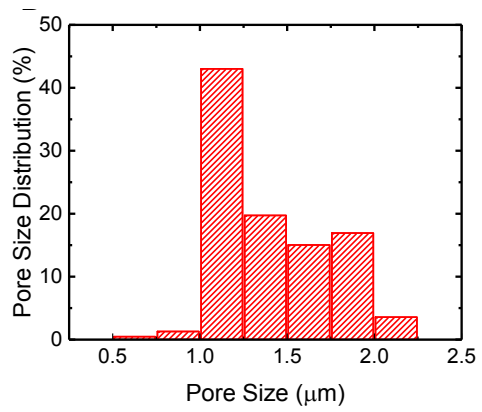

32

33 **Fig. S.3.** Pore size distribution of ceria/silica nanofiber composites.

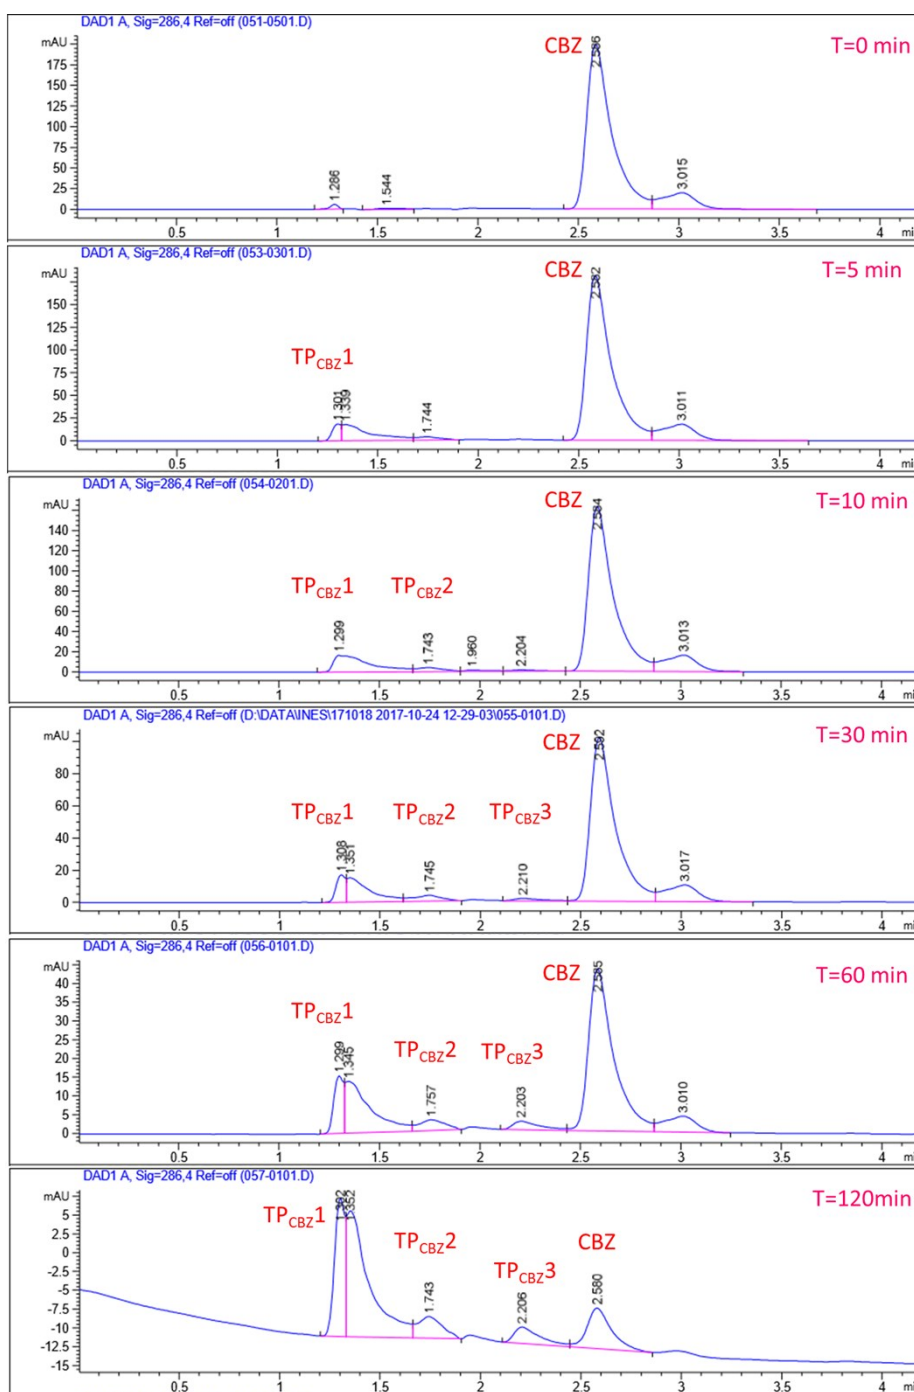

34

35 **Fig. S.4.** HPLC chromatographs taken during oxidation of 1 mg L<sup>-1</sup> carbamazepine (CBZ) by  
 36 ceria/silica fibers at pH 2 in the presence of 0.5 mM H<sub>2</sub>O<sub>2</sub>. Transformation products appeared  
 37 during oxidation at lower retention times, and were marked as TP<sub>CBZ1</sub>, 2 and 3.

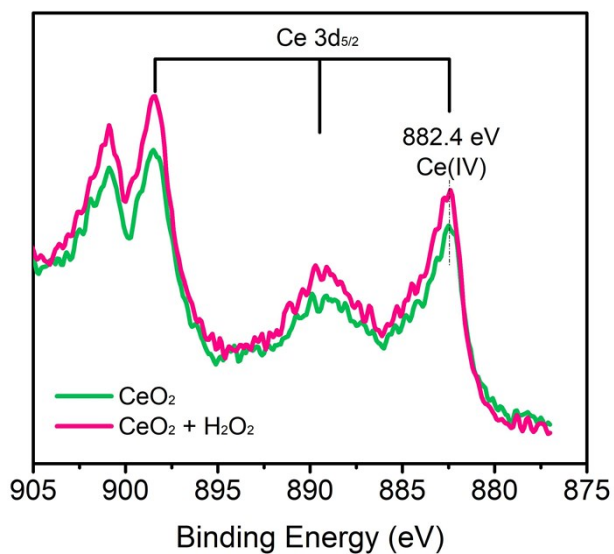

38

39 **Fig. S.5.** High resolution X-ray photoelectron spectroscopy (XPS) spectra of dried CeO<sub>2</sub>  
40 nanoparticles prior to and following addition of 0.5 mM H<sub>2</sub>O<sub>2</sub>. XPS data were obtained with  
41 a scanning XPS microprobe (PHI, VersaProbe II, Japan) using monochromatic Al K  $\alpha$   
42 radiation with a 0.47 eV system resolution.

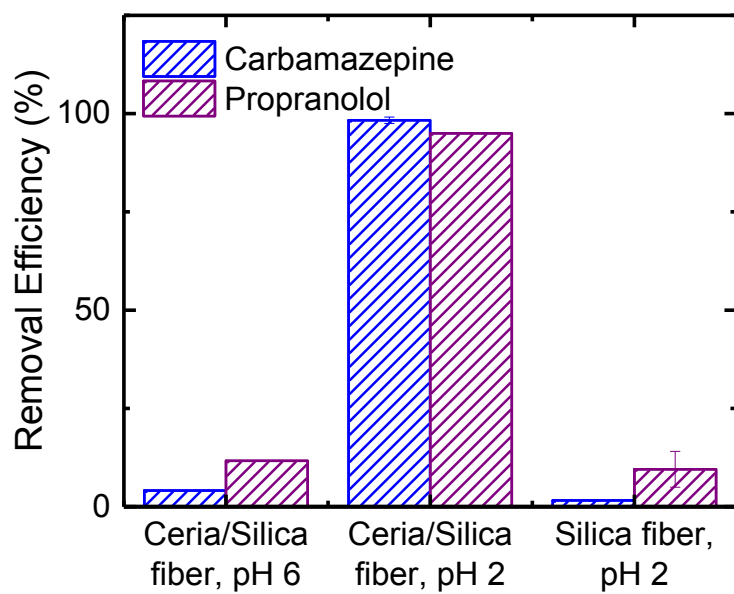

43

44 **Fig. S.6.** Removal efficiency of 1 mg L<sup>-1</sup> carbamazepine (blue) and propranolol (purple) by  
 45 ceria/silica fibers and pristine fibers at pH 2 and 6 in the presence of 0.5 mM H<sub>2</sub>O<sub>2</sub>.

46 **Table S.1.** Chemical structures and properties of the trace organic compounds used in this

47 study.

48

| Property                                | Carbamazepine (CBZ)                                                               | Propranolol (PRO)                                                                  | Perfluorooctanesulfonic acid (PFOS)                                                 |
|-----------------------------------------|-----------------------------------------------------------------------------------|------------------------------------------------------------------------------------|-------------------------------------------------------------------------------------|
| Chemical structure                      | 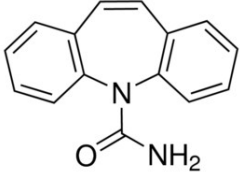 |  |  |
| Molecular formula                       | C <sub>15</sub> H <sub>12</sub> N <sub>2</sub> O                                  | C <sub>16</sub> H <sub>21</sub> NO <sub>2</sub>                                    | CF <sub>3</sub> (CF <sub>2</sub> ) <sub>7</sub> SO <sub>3</sub> H                   |
| Molecular weight (g mol <sup>-1</sup> ) | 236.27                                                                            | 295.80                                                                             | 500.13                                                                              |
| pK <sub>a</sub>                         | 13.9                                                                              | 9.42                                                                               | -3.27                                                                               |

49
